# Supplementary material for: Endothelial Semaphorin 3F Maintains Endothelial Barrier Function and Inhibits Monocyte Migration
Source: MDPI journal article supplement (doi:10.3390/ijms21041471), 2020-02-21
Supplement: s1 [file s1]

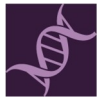

## Supplemental Figures

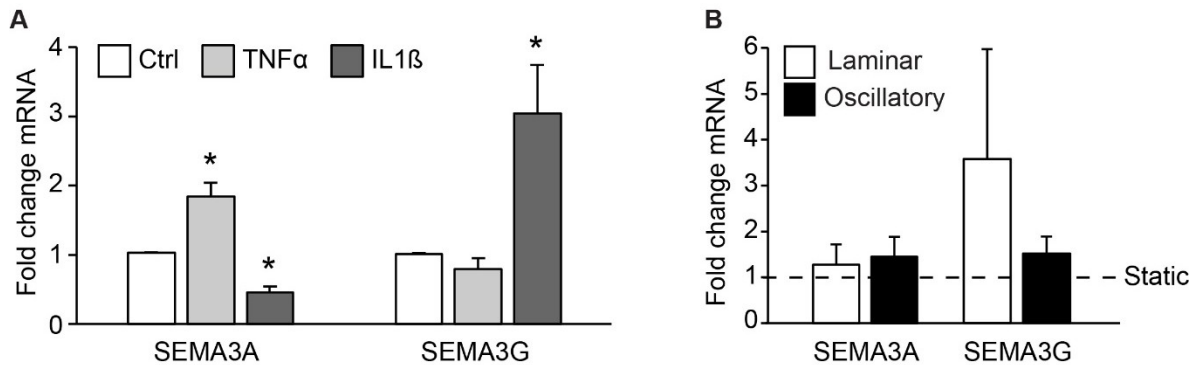

**Supplemental Figure S1.** Regulation of SEMA3A and SEMA3G expression by inflammatory factors or shear stress. **(a)** SEMA3A and SEMA3G expression in HUVECs stimulated with the inflammatory factors, TNF $\alpha$  (10 ng/ml) or IL1 $\beta$  (20 ng/ml) for 24 hours. Results are presented relative to untreated cells. Mean  $\pm$  SEM of  $n=3$ ; \* $p<0.05$ . **(b)** Quantitative qPCR analysis of SEMA3A or SEMA3G mRNA isolated from HUVECs cultured under laminar or oscillatory flow conditions (10 dyn/cm<sup>2</sup>) for 7 days compared to static culture conditions. Results are presented relative to static cultured cells, set as 1. Mean  $\pm$  SEM of  $n=3$ .
